# Supplementary material for: Characteristics of Flow Development and Boiling Transitions in the Liquid Oxygen Chill-Down Process in a Straight Horizontal Exit-Contracted Pipe
Source: Hindawi journal article supplement (doi:10.1155/2023/9088200), 2023-02-07
Supplement: f1 [file 9088200.f1.docx]

**Table 1 Data on the LPF**

| Exp. | Position | *p*LFP (MPa) | *q*LFP (W/m2) | *t*LFP (s) | *T*LFP (K) | *h*LFP (W·m-2·K-1) | *T*sat (K) |
| --- | --- | --- | --- | --- | --- | --- | --- |
| 1 | 0.15-T | 0.97 | 85513.68 | 4.4 | 241.95 | 696.21 | 119.12 |
| 1 | 0.30- T | 0.73 | 29088.11 | 16.0 | 215.34 | 288.50 | 114.51 |
| 1 | 0.45-T | 0.68 | 18850.52 | 23.0 | 188.75 | 250.24 | 113.42 |
| 1 | 0.60- T | 0.71 | 26470.97 | 17.0 | 202.36 | 300.04 | 114.13 |
| 1 | 0.75-T | 0.68 | 17458.87 | 23.0 | 209.05 | 182.57 | 113.42 |
| 1 | 0.90- T | 0.69 | 15378.09 | 24.0 | 205.83 | 166.62 | 113.54 |
| 1 | 1.05-T | 1.03 | 87566.72 | 2.9 | 263.88 | 609.34 | 120.17 |
| 1 | 0.15-B | 0.96 | 107416.20 | 4.9 | 202.94 | 1279.73 | 119.00 |
| 1 | 0.30- B | 0.74 | 36860.14 | 15.0 | 191.07 | 482.48 | 114.67 |
| 1 | 0.45-B | 0.68 | 17381.85 | 23.0 | 203.80 | 192.32 | 113.42 |
| 1 | 0.60- B | 0.68 | 25630.84 | 23.0 | 174.76 | 417.87 | 113.42 |
| 1 | 0.75-B | 0.69 | 23555.28 | 20.0 | 199.61 | 273.46 | 113.47 |
| 1 | 0.90- B | 0.69 | 24096.04 | 24.0 | 186.20 | 331.64 | 113.54 |
| 1 | 1.05-B | 1.02 | 50847.24 | 3.1 | 283.80 | 310.46 | 120.02 |
| 2 | 0.15-T | 1.06 | 95002.36 | 3.0 | 232.50 | 849.63 | 120.68 |
| 2 | 0.30- T | 0.89 | 32045.77 | 11.6 | 219.67 | 314.09 | 117.64 |
| 2 | 0.45-T | 0.88 | 27661.03 | 13.0 | 208.86 | 302.44 | 117.40 |
| 2 | 0.60- T | 0.90 | 23730.69 | 15.0 | 214.29 | 245.98 | 117.82 |
| 2 | 0.75-T | 0.89 | 21868.99 | 16.0 | 218.54 | 216.67 | 117.61 |
| 2 | 0.90- T | 0.90 | 20136.42 | 15.0 | 218.51 | 199.99 | 117.82 |
| 2 | 1.05-T | 1.03 | 58522.96 | 4.0 | 241.54 | 482.25 | 120.19 |
| 2 | 0.15-B | 1.03 | 112827.42 | 4.0 | 201.55 | 1386.77 | 120.19 |
| 2 | 0.30- B | 0.89 | 44380.73 | 12.6 | 180.66 | 703.61 | 117.58 |
| 2 | 0.45-B | 0.93 | 26827.59 | 9.0 | 245.52 | 211.01 | 118.38 |
| 2 | 0.60- B | 0.90 | 34154.05 | 15.0 | 191.09 | 466.15 | 117.82 |
| 2 | 0.75-B | 0.90 | 31365.41 | 15.0 | 197.56 | 393.35 | 117.82 |
| 2 | 0.90- B | 0.92 | 31234.10 | 17.0 | 189.29 | 439.69 | 118.25 |
| 2 | 1.05-B | 1.03 | 36635.57 | 4.0 | 259.10 | 263.74 | 120.19 |
| 3 | 0.15-T | 1.25 | 111470.37 | 2.8 | 228.31 | 1064.26 | 123.57 |
| 3 | 0.30- T | 1.13 | 48675.17 | 7.1 | 230.85 | 446.11 | 121.74 |
| 3 | 0.45-T | 1.13 | 45581.91 | 8.0 | 214.96 | 488.68 | 121.69 |
| 3 | 0.60- T | 1.13 | 37893.56 | 8.0 | 227.06 | 359.64 | 121.69 |
| 3 | 0.75-T | 1.10 | 32647.89 | 12.0 | 211.28 | 362.57 | 121.23 |
| 3 | 0.90- T | 1.10 | 28015.71 | 12.0 | 206.55 | 328.35 | 121.23 |
| 3 | 1.05-T | 1.28 | 73288.76 | 2.3 | 250.93 | 577.57 | 124.04 |
| 3 | 0.15-B | 1.21 | 129403.92 | 3.5 | 198.66 | 1710.92 | 123.03 |
| 3 | 0.30- B | 1.13 | 66230.54 | 7.1 | 203.97 | 805.39 | 121.74 |
| 3 | 0.45-B | 1.11 | 44976.48 | 9.0 | 229.35 | 416.82 | 121.45 |
| 3 | 0.60- B | 1.09 | 48545.06 | 10.0 | 194.11 | 665.19 | 121.13 |
| 3 | 0.75-B | 1.09 | 45509.56 | 10.0 | 198.84 | 585.62 | 121.13 |
| 3 | 0.90- B | 1.10 | 42994.79 | 11.0 | 195.38 | 579.97 | 121.25 |
| 3 | 1.05-B | 1.28 | 42970.04 | 2.3 | 265.88 | 302.94 | 124.04 |
| 4 | 0.15-T | 1.61 | 139389.84 | 2.2 | 235.58 | 1300.58 | 128.40 |
| 4 | 0.30- T | 1.46 | 57430.28 | 4.7 | 247.40 | 474.94 | 126.48 |
| 4 | 0.45-T | 1.43 | 56219.55 | 8.2 | 200.95 | 750.63 | 126.05 |
| 4 | 0.60- T | 1.44 | 43691.04 | 5.0 | 243.26 | 373.33 | 126.23 |
| 4 | 0.75-T | 1.44 | 41935.30 | 6.0 | 243.07 | 358.79 | 126.19 |
| 4 | 0.90- T | 1.44 | 39772.95 | 6.0 | 235.89 | 362.57 | 126.19 |
| 4 | 1.05-T | 1.62 | 86249.32 | 2.1 | 253.22 | 691.09 | 128.42 |
| 4 | 0.15-B | 1.61 | 163153.34 | 2.2 | 224.38 | 1699.91 | 128.40 |
| 4 | 0.30- B | 1.43 | 86210.90 | 6.6 | 196.64 | 1221.66 | 126.07 |
| 4 | 0.45-B | 1.43 | 43513.65 | 8.2 | 228.35 | 425.35 | 126.05 |
| 4 | 0.60- B | 1.43 | 54407.42 | 8.8 | 193.68 | 804.92 | 126.09 |
| 4 | 0.75-B | 1.43 | 47074.78 | 9.0 | 198.59 | 649.02 | 126.06 |
| 4 | 0.90- B | 1.44 | 53454.40 | 10.1 | 188.64 | 849.77 | 125.74 |
| 4 | 1.05-B | 1.61 | 50929.41 | 2.2 | 266.26 | 369.42 | 128.40 |
| 5 | 0.15-T | 2.26 | 188182.53 | 1.6 | 240.94 | 1781.67 | 135.32 |
| 5 | 0.30- T | 2.10 | 71909.05 | 3.1 | 257.55 | 580.86 | 133.75 |
| 5 | 0.45-T | 1.96 | 79394.78 | 6.0 | 202.36 | 1133.24 | 132.30 |
| 5 | 0.60- T | 2.19 | 53820.30 | 1.9 | 268.34 | 402.63 | 134.67 |
| 5 | 0.75-T | 2.25 | 38955.89 | 1.7 | 274.03 | 280.69 | 135.24 |
| 5 | 0.90- T | 2.17 | 44222.34 | 2.2 | 267.09 | 333.33 | 134.42 |
| 5 | 1.05-T | 2.15 | 71341.26 | 2.1 | 256.82 | 582.01 | 134.24 |
| 5 | 0.15-B | 2.19 | 216603.61 | 1.9 | 220.98 | 2509.62 | 134.67 |
| 5 | 0.30- B | 2.03 | 119663.76 | 4.2 | 214.90 | 1462.57 | 133.08 |
| 5 | 0.45-B |  |  |  |  |  |  |
| 5 | 0.60- B | 2.19 | 63910.12 | 1.9 | 264.78 | 491.22 | 134.67 |
| 5 | 0.75-B | 2.17 | 57090.36 | 2.0 | 264.66 | 438.59 | 134.49 |
| 5 | 0.90- B | 2.00 | 35984.94 | 1.4 | 274.35 | 259.18 | 135.51 |
| 5 | 1.05-B | 2.17 | 44138.54 | 2.0 | 269.20 | 327.67 | 134.49 |
| 6 | 0.15-T | 2.85 | 260924.62 | 1.4 | 240.16 | 2617.90 | 140.49 |
| 6 | 0.30- T | 2.68 | 79469.31 | 2.5 | 262.71 | 642.86 | 139.09 |
| 6 | 0.45-T | 2.81 | 99259.10 | 1.5 | 267.34 | 780.78 | 140.21 |
| 6 | 0.60- T | 2.90 | 68284.68 | 1.3 | 275.65 | 506.70 | 140.89 |
| 6 | 0.75-T | 2.79 | 46604.01 | 1.6 | 276.96 | 340.33 | 140.02 |
| 6 | 0.90- T | 2.85 | 56841.65 | 1.4 | 276.23 | 418.75 | 140.49 |
| 6 | 1.05-T | 2.85 | 83350.31 | 1.4 | 271.79 | 634.82 | 140.49 |
| 6 | 0.15-B | 2.85 | 263961.14 | 1.4 | 235.73 | 2771.55 | 140.49 |
| 6 | 0.30- B | 2.66 | 140555.43 | 2.6 | 237.30 | 1428.83 | 138.93 |
| 6 | 0.45-B |  |  |  |  |  |  |
| 6 | 0.60- B | 2.90 | 80699.65 | 1.3 | 272.66 | 612.41 | 140.89 |
| 6 | 0.75-B | 2.85 | 68046.84 | 1.4 | 273.21 | 512.70 | 140.49 |
| 6 | 0.90- B | 2.85 | 30848.69 | 1.4 | 278.97 | 222.76 | 140.49 |
| 6 | 1.05-B | 2.79 | 50820.71 | 1.6 | 277.57 | 369.48 | 140.02 |
| 7 | 0.15-T | 3.48 | 293946.39 | 1.3 | 238.95 | 3135.82 | 145.21 |
| 7 | 0.30- T | 3.42 | 175825.10 | 3.0 | 235.16 | 1946.07 | 144.81 |
| 7 | 0.45-T | 3.40 | 136714.64 | 2.5 | 239.48 | 1441.88 | 144.66 |
| 7 | 0.60- T | 3.52 | 77746.76 | 1.1 | 274.63 | 602.03 | 145.49 |
| 7 | 0.75-T | 3.47 | 54604.86 | 1.4 | 275.40 | 419.32 | 145.18 |
| 7 | 0.90- T | 3.48 | 73858.12 | 1.3 | 273.13 | 577.39 | 145.21 |
| 7 | 1.05-T | 3.48 | 100781.18 | 1.3 | 270.47 | 804.60 | 145.21 |
| 7 | 0.15-B | 3.42 | 311959.40 | 2.0 | 195.32 | 6178.60 | 144.83 |
| 7 | 0.30- B | 3.42 | 182031.19 | 3.0 | 215.91 | 2560.20 | 144.81 |
| 7 | 0.45-B |  |  |  |  |  |  |
| 7 | 0.60- B | 3.52 | 88279.48 | 1.1 | 272.44 | 695.37 | 145.49 |
| 7 | 0.75-B | 3.52 | 79614.23 | 1.2 | 271.84 | 630.32 | 145.53 |
| 7 | 0.90- B | 3.52 | 49023.40 | 1.2 | 277.07 | 372.68 | 145.53 |
| 7 | 1.05-B | 3.47 | 60040.18 | 1.4 | 276.64 | 456.72 | 145.18 |
| 8 | 0.15-T | 3.60 | 296852.19 | 1.8 | 211.08 | 4565.34 | 146.06 |
| 8 | 0.30- T | 3.57 | 155166.37 | 3.0 | 235.20 | 1736.89 | 145.86 |
| 8 | 0.45-T | 3.59 | 125783.85 | 1.9 | 248.45 | 1227.62 | 145.99 |
| 8 | 0.60- T | 3.64 | 81950.60 | 1.2 | 268.53 | 670.54 | 146.31 |
| 8 | 0.75-T | 3.62 | 53555.76 | 1.3 | 272.48 | 423.96 | 146.16 |
| 8 | 0.90- T | 3.62 | 74793.78 | 1.3 | 268.08 | 613.46 | 146.16 |
| 8 | 1.05-T | 3.61 | 102931.09 | 1.4 | 260.18 | 902.20 | 146.09 |
| 8 | 0.15-B | 3.60 | 315207.94 | 1.7 | 204.60 | 5384.02 | 146.05 |
| 8 | 0.30- B | 3.60 | 147679.60 | 1.8 | 247.35 | 1457.97 | 146.06 |
| 8 | 0.45-B |  |  |  |  |  |  |
| 8 | 0.60- B | 3.64 | 95974.76 | 1.2 | 265.91 | 802.44 | 146.31 |
| 8 | 0.75-B | 3.62 | 82356.31 | 1.3 | 265.66 | 689.20 | 146.16 |
| 8 | 0.90- B | 3.61 | 61071.33 | 1.6 | 267.27 | 504.01 | 146.10 |
| 8 | 1.05-B | 3.61 | 64354.15 | 1.5 | 268.52 | 525.79 | 146.13 |

**Table 2 Data on the CHF point**

| Exp. | Position | *p*CHF (MPa) | *q*CHF (W/m2) | *t*CHF (s) | *h*CHF (W·m-2·K-1) | *T*CHF (K) | *T*sat (K) |
| --- | --- | --- | --- | --- | --- | --- | --- |
| 1 | 0.15-T | 0.90 | 215332.24 | 6.7 | 2996.75 | 189.67 | 117.81 |
| 1 | 0.30- T | 0.70 | 149493.38 | 18.9 | 1963.08 | 189.91 | 113.76 |
| 1 | 0.45-T | 0.68 | 284452.15 | 26.1 | 7486.16 | 151.40 | 113.40 |
| 1 | 0.60- T | 0.69 | 326377.33 | 23.1 | 9818.48 | 146.83 | 113.59 |
| 1 | 0.75-T | 0.66 | 198924.74 | 28.7 | 3605.20 | 168.14 | 112.96 |
| 1 | 0.90- T | 0.61 | 244160.55 | 31.1 | 5237.65 | 158.37 | 111.75 |
| 1 | 1.05-T | 0.94 | 201578.23 | 5.3 | 2133.28 | 213.12 | 118.63 |
| 1 | 0.15-B | 0.92 | 351282.57 | 6.1 | 8407.47 | 160.00 | 118.22 |
| 1 | 0.30- B | 0.71 | 226669.16 | 17.6 | 4887.16 | 160.40 | 114.02 |
| 1 | 0.45-B | 0.66 | 196061.54 | 28.6 | 3897.93 | 163.20 | 112.90 |
| 1 | 0.60- B | 0.67 | 209524.11 | 24.6 | 5031.93 | 154.83 | 113.19 |
| 1 | 0.75-B | 0.67 | 210051.98 | 23.4 | 3530.19 | 172.52 | 113.02 |
| 1 | 0.90- B | 0.66 | 117995.68 | 27.8 | 2333.69 | 163.49 | 112.93 |
| 1 | 1.05-B | 0.86 | 96518.40 | 9.5 | 1044.58 | 209.42 | 117.02 |
| 2 | 0.15-T | 1.01 | 277476.56 | 4.8 | 4374.91 | 183.21 | 119.79 |
| 2 | 0.30- T | 0.87 | 150152.23 | 13.6 | 1975.78 | 193.35 | 117.35 |
| 2 | 0.45-T | 0.91 | 258890.01 | 16.9 | 5446.00 | 165.54 | 118.00 |
| 2 | 0.60- T | 0.90 | 198618.16 | 19.4 | 3511.88 | 174.40 | 117.84 |
| 2 | 0.75-T | 0.87 | 279269.42 | 20.9 | 5398.91 | 168.97 | 117.24 |
| 2 | 0.90- T | 0.86 | 291656.30 | 22.4 | 5781.09 | 167.61 | 117.16 |
| 2 | 1.05-T | 0.97 | 144395.86 | 5.8 | 1618.00 | 208.35 | 119.11 |
| 2 | 0.15-B | 1.04 | 323085.82 | 5.0 | 7013.05 | 166.29 | 120.22 |
| 2 | 0.30- B | 0.88 | 187769.77 | 13.0 | 3816.58 | 166.60 | 117.40 |
| 2 | 0.45-B | 0.89 | 102968.93 | 16.4 | 1430.84 | 189.68 | 117.72 |
| 2 | 0.60- B | 0.91 | 171886.66 | 16.7 | 3240.21 | 170.99 | 117.94 |
| 2 | 0.75-B | 0.90 | 192154.48 | 16.3 | 3111.97 | 179.65 | 117.90 |
| 2 | 0.90- B | 0.89 | 167568.07 | 19.0 | 3452.61 | 166.14 | 117.61 |
| 2 | 1.05-B | 0.91 | 97671.52 | 9.7 | 1175.83 | 201.10 | 118.03 |
| 3 | 0.15-T | 1.19 | 277972.79 | 4.2 | 4532.38 | 184.08 | 122.75 |
| 3 | 0.30- T | 1.11 | 174282.78 | 9.0 | 2284.75 | 197.73 | 121.45 |
| 3 | 0.45-T | 1.09 | 261917.69 | 10.7 | 4834.07 | 175.25 | 121.07 |
| 3 | 0.60- T | 1.06 | 206344.41 | 12.8 | 3616.70 | 177.69 | 120.64 |
| 3 | 0.75-T | 1.07 | 240604.69 | 14.0 | 4552.10 | 173.68 | 120.82 |
| 3 | 0.90- T | 1.04 | 259383.71 | 15.1 | 5489.73 | 167.53 | 120.28 |
| 3 | 1.05-T | 1.21 | 193648.83 | 4.5 | 2417.18 | 203.08 | 122.97 |
| 3 | 0.15-B | 1.19 | 334437.91 | 4.2 | 7283.39 | 168.67 | 122.75 |
| 3 | 0.30- B | 1.11 | 195888.43 | 8.9 | 3712.17 | 174.20 | 121.43 |
| 3 | 0.45-B | 1.08 | 125674.05 | 11.2 | 1603.37 | 199.34 | 120.96 |
| 3 | 0.60- B | 1.12 | 177194.41 | 11.1 | 3219.47 | 176.60 | 121.56 |
| 3 | 0.75-B | 1.09 | 183633.89 | 10.9 | 2986.07 | 182.57 | 121.07 |
| 3 | 0.90- B | 1.07 | 187729.05 | 12.7 | 3688.94 | 171.66 | 120.77 |
| 3 | 1.05-B | 1.16 | 145934.15 | 6.0 | 1508.03 | 219.06 | 122.29 |
| 4 | 0.15-T | 1.51 | 299403.46 | 3.6 | 4913.03 | 188.05 | 127.11 |
| 4 | 0.30- T | 1.41 | 196323.96 | 7.5 | 2548.20 | 202.91 | 125.87 |
| 4 | 0.45-T | 1.43 | 269844.22 | 9.0 | 5747.59 | 173.01 | 126.06 |
| 4 | 0.60- T | 1.40 | 207002.82 | 10.4 | 3720.91 | 181.32 | 125.69 |
| 4 | 0.75-T | 1.38 | 226581.94 | 11.2 | 4242.87 | 178.75 | 125.35 |
| 4 | 0.90- T | 1.35 | 240239.94 | 12.0 | 5043.87 | 172.64 | 125.01 |
| 4 | 1.05-T | 1.51 | 199895.02 | 3.6 | 2301.03 | 213.98 | 127.11 |
| 4 | 0.15-B | 1.54 | 334082.04 | 3.7 | 8422.12 | 167.19 | 127.52 |
| 4 | 0.30- B | 1.42 | 197605.21 | 7.3 | 3778.39 | 178.18 | 125.88 |
| 4 | 0.45-B | 1.43 | 130204.00 | 9.8 | 1706.70 | 202.40 | 126.11 |
| 4 | 0.60- B | 1.42 | 170445.74 | 9.3 | 3162.21 | 179.79 | 125.89 |
| 4 | 0.75-B | 1.41 | 175400.32 | 9.4 | 2892.35 | 186.47 | 125.83 |
| 4 | 0.90- B | 1.41 | 194075.03 | 10.5 | 4017.74 | 174.08 | 125.78 |
| 4 | 1.05-B | 1.43 | 151081.21 | 5.2 | 1528.80 | 224.88 | 126.06 |
| 5 | 0.15-T | 2.13 | 321242.66 | 2.8 | 5745.57 | 189.93 | 134.02 |
| 5 | 0.30- T | 1.98 | 214813.42 | 5.4 | 2758.91 | 210.36 | 132.50 |
| 5 | 0.45-T | 1.99 | 266506.44 | 6.6 | 5902.33 | 177.76 | 132.61 |
| 5 | 0.60- T | 1.96 | 212738.61 | 7.4 | 3704.14 | 189.80 | 132.37 |
| 5 | 0.75-T | 1.92 | 240273.06 | 8.2 | 4328.61 | 187.39 | 131.88 |
| 5 | 0.90- T | 1.86 | 236693.14 | 9.0 | 4768.30 | 180.91 | 131.27 |
| 5 | 1.05-T | 2.04 | 206205.89 | 4.1 | 2591.89 | 212.67 | 133.11 |
| 5 | 0.15-B | 2.15 | 332384.38 | 2.9 | 8079.39 | 175.39 | 134.25 |
| 5 | 0.30- B | 1.98 | 193963.13 | 5.4 | 3612.81 | 186.19 | 132.50 |
| 5 | 0.45-B | 1.98 | 245631.85 | 6.8 | 4547.98 | 186.50 | 132.49 |
| 5 | 0.60- B | 1.98 | 169378.76 | 7.1 | 3138.28 | 186.50 | 132.53 |
| 5 | 0.75-B | 1.96 | 154004.62 | 7.4 | 2562.05 | 192.48 | 132.37 |
| 5 | 0.90- B | 1.90 | 208498.91 | 8.4 | 5208.67 | 171.75 | 131.72 |
| 5 | 1.05-B | 1.97 | 150422.13 | 5.7 | 1657.65 | 223.21 | 132.47 |
| 6 | 0.15-T | 2.70 | 328887.28 | 2.3 | 6064.53 | 193.52 | 139.29 |
| 6 | 0.30- T | 2.53 | 315906.87 | 4.1 | 4181.70 | 213.39 | 137.84 |
| 6 | 0.45-T | 2.47 | 258792.65 | 5.2 | 6160.43 | 179.28 | 137.27 |
| 6 | 0.60- T | 2.45 | 212310.53 | 5.7 | 3584.22 | 196.37 | 137.14 |
| 6 | 0.75-T | 2.41 | 308967.93 | 6.2 | 5004.82 | 198.48 | 136.75 |
| 6 | 0.90- T | 2.33 | 239006.29 | 7.2 | 5100.65 | 182.86 | 136.00 |
| 6 | 1.05-T | 2.57 | 212371.47 | 3.8 | 2639.53 | 218.63 | 138.17 |
| 6 | 0.15-B | 2.70 | 352960.51 | 2.3 | 7923.60 | 183.84 | 139.29 |
| 6 | 0.30- B | 2.53 | 224401.43 | 4.1 | 4056.65 | 193.16 | 137.84 |
| 6 | 0.45-B | 2.47 | 166976.71 | 5.2 | 1968.32 | 222.10 | 137.27 |
| 6 | 0.60- B | 2.48 | 174645.19 | 5.5 | 3220.58 | 191.60 | 137.37 |
| 6 | 0.75-B | 2.43 | 164784.43 | 5.9 | 2800.78 | 195.79 | 136.95 |
| 6 | 0.90- B | 2.37 | 218917.91 | 6.6 | 4999.25 | 180.17 | 136.38 |
| 6 | 1.05-B | 2.47 | 149298.65 | 5.1 | 1669.27 | 226.73 | 137.29 |
| 7 | 0.15-T | 3.41 | 329044.57 | 2.1 | 6475.28 | 195.54 | 144.72 |
| 7 | 0.30- T | 3.41 | 234721.65 | 3.3 | 3060.72 | 221.44 | 144.75 |
| 7 | 0.45-T | 3.40 | 240677.15 | 4.2 | 5802.90 | 186.14 | 144.66 |
| 7 | 0.60- T | 3.34 | 198740.36 | 4.7 | 3587.26 | 199.61 | 144.21 |
| 7 | 0.75-T | 3.28 | 320195.80 | 5.1 | 5690.24 | 200.10 | 143.83 |
| 7 | 0.90- T | 3.18 | 209403.56 | 5.7 | 4639.25 | 188.22 | 143.08 |
| 7 | 1.05-T | 3.42 | 185965.78 | 3.6 | 2553.21 | 217.62 | 144.78 |
| 7 | 0.15-B | 3.41 | 318581.88 | 2.1 | 7045.50 | 189.94 | 144.72 |
| 7 | 0.30- B | 3.42 | 218913.31 | 3.5 | 4142.57 | 197.63 | 144.79 |
| 7 | 0.45-B | 3.41 | 178962.21 | 3.4 | 1942.23 | 236.88 | 144.74 |
| 7 | 0.60- B | 3.34 | 171389.89 | 4.6 | 3289.46 | 196.30 | 144.20 |
| 7 | 0.75-B | 3.31 | 155682.88 | 5.0 | 2900.33 | 197.67 | 143.99 |
| 7 | 0.90- B | 3.25 | 212654.70 | 5.4 | 4140.19 | 194.91 | 143.55 |
| 7 | 1.05-B | 3.32 | 142461.41 | 4.9 | 1849.12 | 221.10 | 144.06 |
| 8 | 0.15-T | 3.59 | 326106.84 | 2.0 | 6160.77 | 198.93 | 146.00 |
| 8 | 0.30- T | 3.55 | 202993.53 | 3.3 | 2580.55 | 224.40 | 145.74 |
| 8 | 0.45-T | 3.55 | 230244.50 | 4.0 | 5988.79 | 184.14 | 145.69 |
| 8 | 0.60- T | 3.55 | 199629.85 | 4.4 | 3854.00 | 197.50 | 145.70 |
| 8 | 0.75-T | 3.53 | 241153.22 | 4.7 | 3997.99 | 205.88 | 145.56 |
| 8 | 0.90- T | 3.51 | 196749.45 | 5.3 | 4647.61 | 187.75 | 145.42 |
| 8 | 1.05-T | 3.56 | 180243.91 | 3.4 | 2672.36 | 213.24 | 145.79 |
| 8 | 0.15-B | 3.59 | 310681.46 | 2.0 | 7019.68 | 190.26 | 146.00 |
| 8 | 0.30- B | 3.55 | 212899.87 | 3.3 | 4140.40 | 197.16 | 145.74 |
| 8 | 0.45-B | 3.59 | 156681.90 | 3.1 | 1726.20 | 236.73 | 145.96 |
| 8 | 0.60- B | 3.55 | 167033.43 | 4.3 | 3270.76 | 196.79 | 145.72 |
| 8 | 0.75-B | 3.53 | 155935.60 | 4.5 | 2785.07 | 201.58 | 145.59 |
| 8 | 0.90- B | 3.51 | 193635.68 | 5.0 | 4725.13 | 186.43 | 145.45 |
| 8 | 1.05-B | 3.55 | 135391.49 | 4.3 | 1770.91 | 222.17 | 145.72 |
